# Supplementary material for: The combined measurement of 87Sr/86Sr isotope ratios and 88Sr/85Rb elemental ratios using laser ablation MC-ICP-MS and its application for food provenance studies: the case for Asturian beans
Source: Royal Society of Chemistry journal article supplement (doi:10.1039/c8ja00061a), 2018-01-01
Supplement: c8ja00061a1.pdf [file c8ja00061a1.pdf]

## Supplementary Information

### The combined measurement of $^{87}\text{Sr}/^{86}\text{Sr}$ isotope ratios and $^{88}\text{Sr}/^{85}\text{Rb}$ elemental ratios using Laser Ablation MC-ICP-MS and its application for food provenance studies: the case for Asturian beans.

Aida Reguera-Galan, Mariella Moldovan, J. Ignacio Garcia Alonso\*

Department of Physical and Analytical Chemistry, University of Oviedo. Julián Clavería 8, 33006 Oviedo, Spain.

\*Author to whom correspondence should be addressed:

phone number: +34 985 10 34 84

e-mail address: [jjga@uniovi.es](mailto:jjga@uniovi.es)

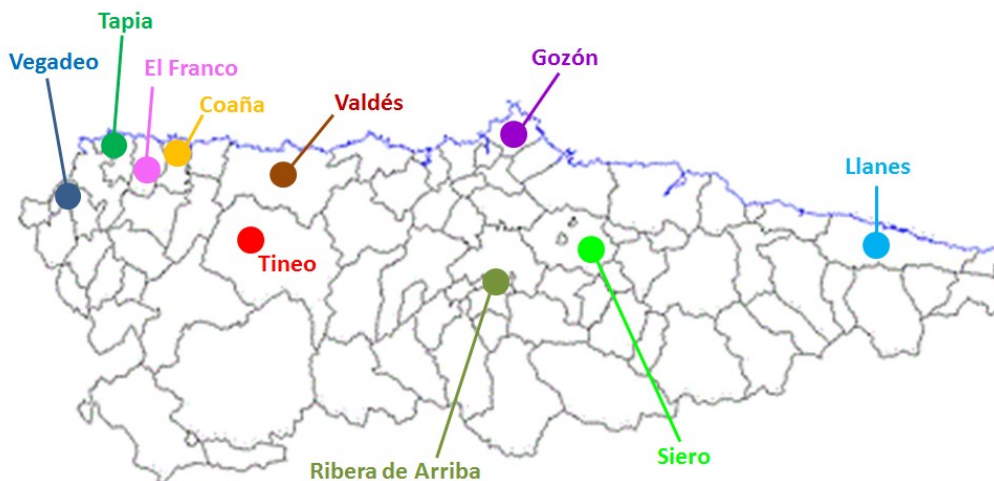

**Figure S1.** Map of Asturias showing the counties of origin of the bean samples.

**Table S1. Full data set for the measured beans.**

| <b>County</b> | <b>Ribera de Arriba</b>                           |                                        |                                        |              |
|---------------|---------------------------------------------------|----------------------------------------|----------------------------------------|--------------|
| <b>Sample</b> | <b><math>^{87}\text{Sr}/^{86}\text{Sr}</math></b> | <b><math>U_{\text{Kragten}}</math></b> | <b><math>f_{\text{Russell}}</math></b> | <b>Sr/Rb</b> |
| 1.1.1         | 0.71236                                           | 0.00025                                | -1.68                                  | 0.328        |
| 1.1.2         | 0.71433                                           | 0.00027                                | -1.70                                  | 0.334        |
| 1.1.3         | 0.71346                                           | 0.00028                                | -1.70                                  | 0.306        |
| 1.1.4         | 0.71295                                           | 0.00038                                | -1.71                                  | 0.313        |
| 1.1.5         | 0.71292                                           | 0.00035                                | -1.69                                  | 0.324        |
| 1.1.6         | 0.71325                                           | 0.00037                                | -1.71                                  | 0.305        |
| 1.1.7         | 0.71372                                           | 0.00027                                | -1.72                                  | 0.398        |
| 1.1.8         | 0.71400                                           | 0.00029                                | -1.72                                  | 0.396        |
| 1.1.9         | 0.71470                                           | 0.00028                                | -1.75                                  | 0.428        |
| 1.2.1         | 0.71282                                           | 0.00017                                | -1.69                                  | 0.642        |
| 1.2.2         | 0.71333                                           | 0.00018                                | -1.70                                  | 0.709        |
| 1.2.3         | 0.71333                                           | 0.00017                                | -1.70                                  | 0.734        |
| 1.2.4         | 0.71346                                           | 0.00018                                | -1.73                                  | 0.848        |
| 1.2.5         | 0.71328                                           | 0.00019                                | -1.72                                  | 0.814        |
| 1.2.6         | 0.71339                                           | 0.00018                                | -1.73                                  | 0.838        |
| 1.2.7         | 0.71337                                           | 0.00016                                | -1.75                                  | 0.950        |
| 1.2.8         | 0.71377                                           | 0.00018                                | -1.75                                  | 0.906        |
| 1.2.9         | 0.71365                                           | 0.00017                                | -1.76                                  | 0.869        |
| 1.3.1         | 0.71263                                           | 0.00018                                | -1.67                                  | 0.710        |
| 1.3.2         | 0.71354                                           | 0.00017                                | -1.69                                  | 0.699        |
| 1.3.3         | 0.71362                                           | 0.00018                                | -1.69                                  | 0.702        |
| 1.3.4         | 0.71340                                           | 0.00024                                | -1.70                                  | 0.425        |
| 1.3.5         | 0.71382                                           | 0.00021                                | -1.70                                  | 0.451        |
| 1.3.6         | 0.71378                                           | 0.00020                                | -1.72                                  | 0.446        |
| 1.3.7         | 0.71373                                           | 0.00017                                | -1.73                                  | 0.756        |
| 1.3.8         | 0.71369                                           | 0.00019                                | -1.73                                  | 0.708        |
| 1.3.9         | 0.71408                                           | 0.00017                                | -1.74                                  | 0.799        |

| County | Llanes                          |                      |                      |       |
|--------|---------------------------------|----------------------|----------------------|-------|
| Sample | $^{87}\text{Sr}/^{86}\text{Sr}$ | $U_{\text{Kragten}}$ | $f_{\text{Russell}}$ | Sr/Rb |
| 2.1.1  | 0.70825                         | 0.00018              | -1.75                | 2.647 |
| 2.1.2  | 0.70816                         | 0.00019              | -1.75                | 2.640 |
| 2.1.3  | 0.70817                         | 0.00016              | -1.77                | 3.265 |
| 2.1.4  | 0.70834                         | 0.00018              | -1.76                | 2.851 |
| 2.1.5  | 0.70833                         | 0.00017              | -1.77                | 2.987 |
| 2.1.6  | 0.70805                         | 0.00018              | -1.77                | 2.795 |
| 2.1.7  | 0.70813                         | 0.00015              | -1.74                | 3.627 |
| 2.1.8  | 0.70815                         | 0.00015              | -1.76                | 3.388 |
| 2.1.9  | 0.70834                         | 0.00015              | -1.69                | 3.158 |
| 2.2.1  | 0.70856                         | 0.00018              | -1.67                | 2.087 |
| 2.2.2  | 0.70872                         | 0.00016              | -1.67                | 2.142 |
| 2.2.3  | 0.70886                         | 0.00017              | -1.68                | 2.358 |
| 2.2.4  | 0.70898                         | 0.00018              | -1.73                | 2.535 |
| 2.2.5  | 0.70886                         | 0.00019              | -1.74                | 2.157 |
| 2.2.6  | 0.70896                         | 0.00018              | -1.75                | 2.367 |
| 2.2.7  | 0.70884                         | 0.00018              | -1.77                | 2.668 |
| 2.2.8  | 0.70862                         | 0.00017              | -1.76                | 2.739 |
| 2.2.9  | 0.70868                         | 0.00016              | -1.77                | 2.987 |
| 2.3.1  | 0.70907                         | 0.00036              | -1.69                | 1.277 |
| 2.3.2  | 0.70853                         | 0.00030              | -1.72                | 1.409 |
| 2.3.3  | 0.70856                         | 0.00030              | -1.75                | 1.277 |
| 2.3.4  | 0.70891                         | 0.00027              | -1.77                | 1.245 |
| 2.3.5  | 0.70959                         | 0.00033              | -1.76                | 1.282 |
| 2.3.6  | 0.70900                         | 0.00031              | -1.75                | 1.369 |
| 2.3.7  | 0.70910                         | 0.00033              | -1.74                | 1.255 |
| 2.3.8  | 0.70874                         | 0.00028              | -1.75                | 1.223 |
| 2.3.9  | 0.70867                         | 0.00026              | -1.75                | 1.258 |

**County**                      **Valdés (1)**

| <b>Sample</b> | <b><math>^{87}\text{Sr}/^{86}\text{Sr}</math></b> | <b><math>U_{\text{Kragten}}</math></b> | <b><math>f_{\text{Russell}}</math></b> | <b>Sr/Rb</b> |
|---------------|---------------------------------------------------|----------------------------------------|----------------------------------------|--------------|
| 3.1.1         | 0.70842                                           | 0.00018                                | -1.63                                  | 0.696        |
| 3.1.2         | 0.70919                                           | 0.00024                                | -1.72                                  | 0.864        |
| 3.1.3         | 0.70906                                           | 0.00022                                | -1.73                                  | 0.914        |
| 3.1.4         | 0.70972                                           | 0.00019                                | -1.75                                  | 1.053        |
| 3.1.5         | 0.70920                                           | 0.00019                                | -1.75                                  | 1.093        |
| 3.1.6         | 0.70899                                           | 0.00019                                | -1.75                                  | 1.062        |
| 3.1.7         | 0.70937                                           | 0.00018                                | -1.74                                  | 0.995        |
| 3.1.8         | 0.70961                                           | 0.00017                                | -1.75                                  | 1.033        |
| 3.1.9         | 0.70980                                           | 0.00019                                | -1.75                                  | 0.956        |
| 3.2.1         | 0.70914                                           | 0.00026                                | -1.60                                  | 0.544        |
| 3.2.2         | 0.70918                                           | 0.00023                                | -1.67                                  | 0.588        |
| 3.2.3         | 0.70938                                           | 0.00025                                | -1.72                                  | 0.654        |
| 3.2.4         | 0.70979                                           | 0.00031                                | -1.76                                  | 0.647        |
| 3.2.5         | 0.70973                                           | 0.00027                                | -1.75                                  | 0.661        |
| 3.2.6         | 0.70943                                           | 0.00029                                | -1.75                                  | 0.580        |
| 3.2.7         | 0.70927                                           | 0.00032                                | -1.75                                  | 0.647        |
| 3.2.8         | 0.70976                                           | 0.00037                                | -1.74                                  | 0.581        |
| 3.2.9         | 0.71000                                           | 0.00038                                | -1.75                                  | 0.547        |
| 3.3.1         | 0.70913                                           | 0.00018                                | -1.62                                  | 1.208        |
| 3.3.2         | 0.70907                                           | 0.00017                                | -1.68                                  | 1.152        |
| 3.3.3         | 0.70896                                           | 0.00017                                | -1.70                                  | 1.058        |
| 3.3.4         | 0.70930                                           | 0.00017                                | -1.72                                  | 1.099        |
| 3.3.5         | 0.70934                                           | 0.00016                                | -1.73                                  | 1.291        |
| 3.3.6         | 0.70943                                           | 0.00017                                | -1.72                                  | 1.203        |
| 3.3.7         | 0.70948                                           | 0.00018                                | -1.74                                  | 1.088        |
| 3.3.8         | 0.70931                                           | 0.00020                                | -1.71                                  | 0.996        |
| 3.3.9         | 0.70931                                           | 0.00017                                | -1.73                                  | 1.266        |

**County Vegadeo (1)**

| <b>Sample</b> | <b><math>^{87}\text{Sr}/^{86}\text{Sr}</math></b> | <b><math>U_{\text{Kragten}}</math></b> | <b><math>f_{\text{Russell}}</math></b> | <b>Sr/Rb</b> |
|---------------|---------------------------------------------------|----------------------------------------|----------------------------------------|--------------|
| 4.1.1         | 0.70964                                           | 0.00026                                | -1.62                                  | 0.414        |
| 4.1.2         | 0.71059                                           | 0.00021                                | -1.65                                  | 0.489        |
| 4.1.3         | 0.71034                                           | 0.00022                                | -1.70                                  | 0.525        |
| 4.1.4         | 0.71085                                           | 0.00027                                | 1.73                                   | 0.600        |
| 4.1.5         | 0.71103                                           | 0.00029                                | -1.73                                  | 0.576        |
| 4.1.6         | 0.71087                                           | 0.00027                                | -1.74                                  | 0.623        |
| 4.1.7         | 0.71062                                           | 0.00028                                | -1.73                                  | 0.679        |
| 4.1.8         | 0.71121                                           | 0.00030                                | -1.73                                  | 0.687        |
| 4.1.9         | 0.71165                                           | 0.00030                                | -1.74                                  | 0.636        |
| 4.2.1         | 0.71131                                           | 0.00029                                | -1.70                                  | 0.411        |
| 4.2.2         | 0.71150                                           | 0.00027                                | -1.65                                  | 0.494        |
| 4.2.3         | 0.71176                                           | 0.00028                                | -1.67                                  | 0.539        |
| 4.2.4         | 0.71105                                           | 0.00030                                | -1.72                                  | 0.561        |
| 4.2.5         | 0.71121                                           | 0.00028                                | -1.72                                  | 0.622        |
| 4.2.6         | 0.71094                                           | 0.00031                                | -1.71                                  | 0.551        |
| 4.2.7         | 0.71118                                           | 0.00029                                | -1.74                                  | 0.670        |
| 4.2.8         | 0.71177                                           | 0.00029                                | -1.72                                  | 0.646        |
| 4.2.9         | 0.71156                                           | 0.00030                                | -1.72                                  | 0.636        |
| 4.3.1         | 0.71113                                           | 0.00022                                | -1.63                                  | 0.608        |
| 4.3.2         | 0.71176                                           | 0.00020                                | -1.64                                  | 0.696        |
| 4.3.3         | 0.71167                                           | 0.00022                                | -1.63                                  | 0.772        |
| 4.3.4         | 0.71191                                           | 0.00025                                | -1.69                                  | 0.665        |
| 4.3.5         | 0.71196                                           | 0.00026                                | -1.71                                  | 0.680        |
| 4.3.6         | 0.71130                                           | 0.00030                                | -1.71                                  | 0.626        |
| 4.3.7         | 0.71205                                           | 0.00022                                | -1.71                                  | 0.859        |
| 4.3.8         | 0.71155                                           | 0.00023                                | -1.73                                  | 0.739        |
| 4.3.9         | 0.71145                                           | 0.00020                                | -1.72                                  | 0.933        |

**County Vegadeo (2)**

| <b>Sample</b> | <b><math>^{87}\text{Sr}/^{86}\text{Sr}</math></b> | <b><math>U_{\text{Kragten}}</math></b> | <b><math>f_{\text{Russell}}</math></b> | <b>Sr/Rb</b> |
|---------------|---------------------------------------------------|----------------------------------------|----------------------------------------|--------------|
| 5.1.1         | 0.70769                                           | 0.00071                                | -1.58                                  | 0.148        |
| 5.1.2         | 0.71213                                           | 0.00072                                | -1.62                                  | 0.157        |
| 5.1.3         | 0.71202                                           | 0.00081                                | -1.56                                  | 0.155        |
| 5.1.4         | 0.71196                                           | 0.00129                                | -1.71                                  | 0.117        |
| 5.1.5         | 0.71310                                           | 0.00129                                | -1.69                                  | 0.113        |
| 5.1.6         | 0.71166                                           | 0.00126                                | -1.75                                  | 0.127        |
| 5.1.7         | 0.71201                                           | 0.00146                                | -1.81                                  | 0.116        |
| 5.1.8         | 0.71116                                           | 0.00148                                | -1.65                                  | 0.139        |
| 5.1.9         | 0.71015                                           | 0.00144                                | -1.72                                  | 0.136        |
| 5.2.1         | 0.71085                                           | 0.00027                                | -1.60                                  | 0.580        |
| 5.2.2         | 0.71154                                           | 0.00024                                | -1.67                                  | 0.616        |
| 5.2.3         | 0.71136                                           | 0.00028                                | -1.68                                  | 0.584        |
| 5.2.4         | 0.71186                                           | 0.00026                                | -1.71                                  | 0.698        |
| 5.2.5         | 0.71174                                           | 0.00030                                | -1.71                                  | 0.602        |
| 5.2.6         | 0.71176                                           | 0.00032                                | -1.74                                  | 0.637        |
| 5.2.7         | 0.71192                                           | 0.00023                                | -1.73                                  | 0.871        |
| 5.2.8         | 0.71195                                           | 0.00029                                | -1.72                                  | 0.835        |
| 5.2.9         | 0.71217                                           | 0.00028                                | -1.73                                  | 0.797        |
| 5.3.1         | 0.70702                                           | 0.00074                                | -1.47                                  | 0.155        |
| 5.3.2         | 0.70921                                           | 0.00091                                | -1.62                                  | 0.155        |
| 5.3.3         | 0.70915                                           | 0.00098                                | -1.66                                  | 0.153        |
| 5.3.4         | 0.71086                                           | 0.00062                                | -1.72                                  | 0.249        |
| 5.3.5         | 0.71090                                           | 0.00065                                | -1.75                                  | 0.276        |
| 5.3.6         | 0.71023                                           | 0.00059                                | -1.75                                  | 0.326        |
| 5.3.7         | 0.71091                                           | 0.00087                                | -1.74                                  | 0.269        |
| 5.3.8         | 0.71205                                           | 0.00084                                | -1.77                                  | 0.301        |
| 5.3.9         | 0.71222                                           | 0.00082                                | -1.78                                  | 0.298        |

| County | Siero                           |                      |                      |       |
|--------|---------------------------------|----------------------|----------------------|-------|
| Sample | $^{87}\text{Sr}/^{86}\text{Sr}$ | $U_{\text{Kragten}}$ | $f_{\text{Russell}}$ | Sr/Rb |
| 6.1.1  | 0.71011                         | 0.00038              | -1.67                | 1.146 |
| 6.1.2  | 0.70971                         | 0.00027              | -1.67                | 1.289 |
| 6.1.3  | 0.71009                         | 0.00031              | -1.69                | 1.338 |
| 6.1.4  | 0.71051                         | 0.00051              | -1.75                | 1.147 |
| 6.1.5  | 0.70966                         | 0.00047              | -1.75                | 1.247 |
| 6.1.6  | 0.70975                         | 0.00044              | -1.79                | 1.398 |
| 6.1.7  | 0.71092                         | 0.00041              | -1.75                | 1.675 |
| 6.1.8  | 0.70968                         | 0.00050              | -1.74                | 1.349 |
| 6.1.9  | 0.71079                         | 0.00047              | -1.75                | 1.348 |
| 6.2.1  | 0.70959                         | 0.00031              | -1.68                | 0.768 |
| 6.2.2  | 0.71053                         | 0.00030              | -1.78                | 1.000 |
| 6.2.3  | 0.71003                         | 0.00031              | -1.78                | 1.075 |
| 6.2.4  | 0.71088                         | 0.00066              | -1.83                | 0.653 |
| 6.2.5  | 0.71056                         | 0.00055              | -1.77                | 0.809 |
| 6.2.6  | 0.70918                         | 0.00056              | -1.76                | 0.783 |
| 6.2.7  | 0.71001                         | 0.00043              | -1.78                | 0.878 |
| 6.2.8  | 0.70998                         | 0.00043              | -1.77                | 0.846 |
| 6.2.9  | 0.71026                         | 0.00044              | -1.77                | 0.816 |
| 6.3.1  | 0.71023                         | 0.00024              | -1.60                | 1.526 |
| 6.3.2  | 0.71045                         | 0.00028              | -1.66                | 1.571 |
| 6.3.3  | 0.71016                         | 0.00035              | -1.69                | 1.373 |
| 6.3.4  | 0.71077                         | 0.00039              | -1.74                | 1.647 |
| 6.3.5  | 0.70930                         | 0.00046              | -1.77                | 1.581 |
| 6.3.6  | 0.71078                         | 0.00045              | -1.78                | 1.605 |
| 6.3.7  | 0.71041                         | 0.00025              | -1.75                | 2.410 |
| 6.3.8  | 0.71024                         | 0.00033              | -1.77                | 2.430 |
| 6.3.9  | 0.7107                          | 0.00028              | -1.78                | 2.118 |

| County | Coaña                           |                      |                      |       |
|--------|---------------------------------|----------------------|----------------------|-------|
| Sample | $^{87}\text{Sr}/^{86}\text{Sr}$ | $U_{\text{Kragten}}$ | $f_{\text{Russell}}$ | Sr/Rb |
| 7.1.1  | 0.70679                         | 0.00020              | -1.62                | 1.483 |
| 7.1.2  | 0.70697                         | 0.00020              | -1.68                | 1.660 |
| 7.1.3  | 0.70694                         | 0.00021              | -1.71                | 1.764 |
| 7.1.4  | 0.70676                         | 0.00023              | -1.75                | 2.336 |
| 7.1.5  | 0.70692                         | 0.00023              | -1.74                | 2.162 |
| 7.1.6  | 0.70730                         | 0.00023              | -1.76                | 2.276 |
| 7.1.7  | 0.70698                         | 0.00020              | -1.75                | 2.412 |
| 7.1.8  | 0.70736                         | 0.00021              | -1.75                | 2.180 |
| 7.1.9  | 0.70708                         | 0.00021              | -1.74                | 1.932 |
| 7.2.1  | 0.70651                         | 0.00015              | -1.61                | 3.198 |
| 7.2.2  | 0.70679                         | 0.00016              | -1.69                | 3.098 |
| 7.2.3  | 0.70671                         | 0.00017              | -1.72                | 3.129 |
| 7.2.4  | 0.70685                         | 0.00018              | -1.74                | 3.587 |
| 7.2.5  | 0.70669                         | 0.00017              | -1.74                | 3.749 |
| 7.2.6  | 0.70679                         | 0.00017              | -1.75                | 4.210 |
| 7.2.7  | 0.70672                         | 0.00018              | -1.74                | 3.471 |
| 7.2.8  | 0.70682                         | 0.00016              | -1.74                | 4.053 |
| 7.2.9  | 0.70689                         | 0.00017              | -1.76                | 3.742 |
| 7.3.1  | 0.71203                         | 0.00032              | -1.57                | 1.240 |
| 7.3.2  | 0.71118                         | 0.00021              | -1.61                | 1.640 |
| 7.3.3  | 0.71115                         | 0.00024              | -1.64                | 1.885 |
| 7.3.4  | 0.71119                         | 0.00024              | -1.71                | 1.921 |
| 7.3.5  | 0.71105                         | 0.00024              | -1.73                | 1.938 |
| 7.3.6  | 0.71085                         | 0.00023              | -1.74                | 2.188 |
| 7.3.7  | 0.71074                         | 0.00023              | -1.73                | 2.372 |
| 7.3.8  | 0.71044                         | 0.00020              | -1.73                | 2.739 |
| 7.3.9  | 0.71038                         | 0.00025              | -1.72                | 2.347 |



**County**                      **Valdés (2)**

| <b>Sample</b> | <b><sup>87</sup>Sr/<sup>86</sup>Sr</b> | <b>U<sub>Kragten</sub></b> | <b>f<sub>Russell</sub></b> | <b>Sr/Rb</b> |
|---------------|----------------------------------------|----------------------------|----------------------------|--------------|
| 8.1.1         | 0.70868                                | 0.00036                    | -1.61                      | 0.315        |
| 8.1.2         | 0.71049                                | 0.00035                    | -1.67                      | 0.309        |
| 8.1.3         | 0.71040                                | 0.00038                    | -1.70                      | 0.347        |
| 8.1.4         | 0.71073                                | 0.00046                    | -1.75                      | 0.384        |
| 8.1.5         | 0.71102                                | 0.00032                    | -1.74                      | 0.481        |
| 8.1.6         | 0.70988                                | 0.00029                    | -1.74                      | 0.441        |
| 8.1.7         | 0.71008                                | 0.00038                    | -1.72                      | 0.410        |
| 8.1.8         | 0.71079                                | 0.00036                    | -1.73                      | 0.445        |
| 8.1.9         | 0.71076                                | 0.0033                     | -1.73                      | 0.448        |
| 8.2.1         | 0.70201                                | 0.00068                    | -1.58                      | 0.165        |
| 8.2.2         | 0.70998                                | 0.00069                    | -1.68                      | 0.188        |
| 8.2.3         | 0.71039                                | 0.00061                    | -1.69                      | 0.207        |
| 8.2.4         | 0.70931                                | 0.00065                    | -1.74                      | 0.246        |
| 8.2.5         | 0.71144                                | 0.00050                    | -1.74                      | 0.304        |
| 8.2.6         | 0.71176                                | 0.00058                    | -1.74                      | 0.273        |
| 8.2.7         | 0.71061                                | 0.00065                    | -1.74                      | 0.257        |
| 8.2.8         | 0.70830                                | 0.00063                    | -1.72                      | 0.326        |
| 8.2.9         | 0.70970                                | 0.00050                    | -1.73                      | 0.352        |
| 8.3.1         | 0.70812                                | 0.00040                    | -1.58                      | 0.348        |
| 8.3.2         | 0.70972                                | 0.00035                    | -1.67                      | 0.356        |
| 8.3.3         | 0.70983                                | 0.00040                    | -1.71                      | 0.377        |
| 8.3.4         | 0.71054                                | 0.00047                    | -1.72                      | 0.374        |
| 8.3.5         | 0.71028                                | 0.00049                    | -1.75                      | 0.379        |
| 8.3.6         | 0.70989                                | 0.00040                    | -1.74                      | 0.408        |
| 8.3.7         | 0.71103                                | 0.00041                    | -1.72                      | 0.521        |
| 8.3.8         | 0.71141                                | 0.00044                    | -1.74                      | 0.477        |
| 8.3.9         | 0.71022                                | 0.00045                    | -1.74                      | 0.509        |

**County****Gozón**

| <b>Sample</b> | <b><math>^{87}\text{Sr}/^{86}\text{Sr}</math></b> | <b><math>U_{\text{Kragten}}</math></b> | <b><math>f_{\text{Russell}}</math></b> | <b>Sr/Rb</b> |
|---------------|---------------------------------------------------|----------------------------------------|----------------------------------------|--------------|
| 9.1.1         | 0.71012                                           | 0.00035                                | -1.59                                  | 0.808        |
| 9.1.2         | 0.71031                                           | 0.00034                                | -1.64                                  | 1.154        |
| 9.1.3         | 0.71047                                           | 0.00035                                | -1.67                                  | 1.136        |
| 9.1.4         | 0.71093                                           | 0.00044                                | -1.70                                  | 0.807        |
| 9.1.5         | 0.71068                                           | 0.00042                                | -1.74                                  | 0.914        |
| 9.1.6         | 0.71084                                           | 0.00053                                | -1.70                                  | 0.844        |
| 9.1.7         | 0.71034                                           | 0.00044                                | -1.72                                  | 1.163        |
| 9.1.8         | 0.71014                                           | 0.00041                                | -1.73                                  | 1.101        |
| 9.1.9         | 0.71126                                           | 0.00051                                | -1.72                                  | 1.046        |
| 9.2.1         | 0.71056                                           | 0.00021                                | -1.64                                  | 2.139        |
| 9.2.2         | 0.71034                                           | 0.00019                                | -1.71                                  | 2.600        |
| 9.2.3         | 0.71000                                           | 0.00021                                | -1.70                                  | 2.262        |
| 9.2.4         | 0.71039                                           | 0.00024                                | -1.68                                  | 3.034        |
| 9.2.5         | 0.70991                                           | 0.00022                                | -1.65                                  | 3.133        |
| 9.2.6         | 0.70994                                           | 0.00027                                | -1.65                                  | 2.762        |
| 9.2.7         | 0.70988                                           | 0.00021                                | -1.63                                  | 3.740        |
| 9.2.8         | 0.70993                                           | 0.00019                                | -1.63                                  | 4.442        |
| 9.2.9         | 0.70993                                           | 0.00021                                | -1.62                                  | 4.199        |
| 9.3.1         | 0.71022                                           | 0.00017                                | -1.67                                  | 2.120        |
| 9.3.2         | 0.71019                                           | 0.00018                                | -1.71                                  | 2.212        |
| 9.3.3         | 0.70992                                           | 0.00021                                | -1.70                                  | 2.012        |
| 9.3.4         | 0.70989                                           | 0.00025                                | -1.67                                  | 1.960        |
| 9.3.5         | 0.71026                                           | 0.00024                                | -1.66                                  | 2.142        |
| 9.3.6         | 0.70944                                           | 0.00024                                | -1.65                                  | 2.126        |
| 9.3.7         | 0.70975                                           | 0.00023                                | -1.63                                  | 2.257        |
| 9.3.8         | 0.70963                                           | 0.00023                                | -1.65                                  | 2.422        |
| 9.3.9         | 0.70949                                           | 0.00026                                | -1.62                                  | 1.970        |

**County Vegadeo (3)**

| <b>Sample</b> | <b><math>^{87}\text{Sr}/^{86}\text{Sr}</math></b> | <b><math>U_{\text{Kragten}}</math></b> | <b><math>f_{\text{Russell}}</math></b> | <b>Sr/Rb</b> |
|---------------|---------------------------------------------------|----------------------------------------|----------------------------------------|--------------|
| 10.1.1        | 0.71018                                           | 0.00017                                | -1.66                                  | 1.838        |
| 10.1.2        | 0.71043                                           | 0.00017                                | -1.68                                  | 2.181        |
| 10.1.3        | 0.71056                                           | 0.00017                                | -1.69                                  | 2.277        |
| 10.1.4        | 0.71043                                           | 0.00017                                | -1.70                                  | 2.410        |
| 10.1.5        | 0.71041                                           | 0.00017                                | -1.70                                  | 2.595        |
| 10.1.6        | 0.71076                                           | 0.00017                                | -1.72                                  | 2.671        |
| 10.1.7        | 0.71066                                           | 0.00019                                | -1.73                                  | 3.028        |
| 10.1.8        | 0.71059                                           | 0.00018                                | -1.74                                  | 3.035        |
| 10.1.9        | 0.71082                                           | 0.00019                                | -1.73                                  | 3.146        |
| 10.2.1        | 0.71065                                           | 0.00019                                | -1.61                                  | 2.311        |
| 10.2.2        | 0.71070                                           | 0.00018                                | -1.70                                  | 2.451        |
| 10.2.3        | 0.71056                                           | 0.00018                                | -1.75                                  | 2.654        |
| 10.2.4        | 0.71056                                           | 0.00018                                | -1.76                                  | 2.618        |
| 10.2.5        | 0.71061                                           | 0.00018                                | -1.77                                  | 2.731        |
| 10.2.6        | 0.71081                                           | 0.00018                                | -1.78                                  | 2.772        |
| 10.2.7        | 0.71057                                           | 0.00017                                | -1.77                                  | 2.780        |
| 10.2.8        | 0.71078                                           | 0.00019                                | -1.77                                  | 2.577        |
| 10.2.9        | 0.71067                                           | 0.00018                                | -1.77                                  | 2.815        |
| 10.3.1        | 0.71017                                           | 0.00018                                | -1.68                                  | 1.221        |
| 10.3.2        | 0.71016                                           | 0.00017                                | -1.70                                  | 1.436        |
| 10.3.3        | 0.71037                                           | 0.00017                                | -1.74                                  | 1.516        |
| 10.3.4        | 0.71074                                           | 0.00020                                | -1.76                                  | 1.612        |
| 10.3.5        | 0.71034                                           | 0.00021                                | -1.75                                  | 1.695        |
| 10.3.6        | 0.71061                                           | 0.00020                                | -1.76                                  | 1.822        |
| 10.3.7        | 0.71039                                           | 0.00017                                | -1.76                                  | 2.714        |
| 10.3.8        | 0.71064                                           | 0.00018                                | -1.76                                  | 2.325        |
| 10.3.9        | 0.71050                                           | 0.00018                                | -1.76                                  | 2.381        |

| <b>County Valdés (3)</b> |                                                   |                                        |                                        |              |
|--------------------------|---------------------------------------------------|----------------------------------------|----------------------------------------|--------------|
| <b>Sample</b>            | <b><math>^{87}\text{Sr}/^{86}\text{Sr}</math></b> | <b><math>U_{\text{Kragten}}</math></b> | <b><math>f_{\text{Russell}}</math></b> | <b>Sr/Rb</b> |
| 11.1.1                   | 0.71017                                           | 0.00023                                | -1.66                                  | 0.308        |
| 11.1.2                   | 0.71133                                           | 0.00023                                | -1.69                                  | 0.336        |
| 11.1.3                   | 0.71096                                           | 0.00023                                | -1.69                                  | 0.352        |
| 11.1.4                   | 0.71013                                           | 0.00031                                | -1.68                                  | 0.332        |
| 11.1.5                   | 0.71081                                           | 0.00025                                | -1.73                                  | 0.335        |
| 11.1.6                   | 0.71084                                           | 0.00024                                | -1.73                                  | 0.358        |
| 11.1.7                   | 0.71163                                           | 0.00040                                | -1.72                                  | 0.265        |
| 11.1.8                   | 0.71251                                           | 0.00031                                | -1.75                                  | 0.274        |
| 11.1.9                   | 0.71352                                           | 0.00046                                | -1.74                                  | 0.238        |
| 11.2.1                   | 0.71079                                           | 0.00025                                | -1.65                                  | 0.262        |
| 11.2.2                   | 0.71153                                           | 0.00022                                | -1.68                                  | 0.302        |
| 11.2.3                   | 0.71186                                           | 0.00023                                | -1.69                                  | 0.304        |
| 11.2.4                   | 0.71101                                           | 0.00022                                | -1.73                                  | 0.408        |
| 11.2.5                   | 0.71147                                           | 0.00020                                | -1.73                                  | 0.448        |
| 11.2.6                   | 0.71120                                           | 0.00020                                | -1.74                                  | 0.461        |
| 11.2.7                   | 0.71237                                           | 0.00025                                | -1.74                                  | 0.475        |
| 11.2.8                   | 0.71223                                           | 0.00026                                | -1.73                                  | 0.423        |
| 11.2.9                   | 0.71210                                           | 0.00028                                | -1.73                                  | 0.413        |
| 11.3.1                   | 0.70966                                           | 0.00030                                | -1.61                                  | 0.304        |
| 11.3.2                   | 0.71136                                           | 0.00024                                | -1.67                                  | 0.301        |
| 11.3.3                   | 0.71087                                           | 0.00026                                | -1.70                                  | 0.290        |
| 11.3.4                   | 0.71113                                           | 0.00037                                | -1.70                                  | 0.283        |
| 11.3.5                   | 0.71145                                           | 0.00039                                | -1.72                                  | 0.275        |
| 11.3.6                   | 0.71238                                           | 0.00038                                | -1.75                                  | 0.286        |
| 11.3.7                   | 0.71185                                           | 0.00030                                | -1.72                                  | 0.286        |
| 11.3.8                   | 0.71282                                           | 0.00043                                | -1.72                                  | 0.254        |
| 11.3.9                   | 0.71294                                           | 0.00047                                | -1.69                                  | 0.222        |

**County**                      **Valdés (4)**

| <b>Sample</b> | <b><sup>87</sup>Sr/<sup>86</sup>Sr</b> | <b>U<sub>Kragten</sub></b> | <b>f<sub>Russell</sub></b> | <b>Sr/Rb</b> |
|---------------|----------------------------------------|----------------------------|----------------------------|--------------|
| 12.1.1        | 0.71107                                | 0.00077                    | -1.48                      | 0.116        |
| 12.1.2        | 0.71467                                | 0.00067                    | -1.55                      | 0.124        |
| 12.1.3        | 0.71430                                | 0.00085                    | -1.52                      | 0.126        |
| 12.1.4        | 0.71376                                | 0.00078                    | -1.58                      | 0.139        |
| 12.1.5        | 0.71292                                | 0.00093                    | -1.58                      | 0.130        |
| 12.1.6        | 0.71347                                | 0.00088                    | -1.59                      | 0.142        |
| 12.1.7        | 0.71318                                | 0.00095                    | -1.59                      | 0.125        |
| 12.1.8        | 0.71230                                | 0.00114                    | -1.58                      | 0.129        |
| 12.1.9        | 0.71393                                | 0.00129                    | -1.59                      | 0.121        |
| 12.2.1        | 0.70991                                | 0.00025                    | -1.64                      | 0.394        |
| 12.2.2        | 0.71042                                | 0.00026                    | -1.65                      | 0.443        |
| 12.2.3        | 0.71077                                | 0.00026                    | -1.69                      | 0.419        |
| 12.2.4        | 0.71052                                | 0.00021                    | -1.71                      | 0.651        |
| 12.2.5        | 0.71050                                | 0.00019                    | -1.73                      | 0.700        |
| 12.2.6        | 0.71054                                | 0.00020                    | -1.74                      | 0.704        |
| 12.2.7        | 0.71105                                | 0.00021                    | -1.73                      | 0.644        |
| 12.2.8        | 0.71123                                | 0.00022                    | -1.74                      | 0.614        |
| 12.2.9        | 0.71082                                | 0.00021                    | -1.74                      | 0.625        |
| 12.3.1        | 0.71016                                | 0.00027                    | -1.63                      | 0.346        |
| 12.3.2        | 0.71022                                | 0.00023                    | -1.66                      | 0.462        |
| 12.3.3        | 0.71020                                | 0.00027                    | -1.70                      | 0.471        |
| 12.3.4        | 0.71084                                | 0.00035                    | -1.72                      | 0.420        |
| 12.3.5        | 0.71031                                | 0.00032                    | -1.72                      | 0.403        |
| 12.3.6        | 0.71101                                | 0.00032                    | -1.73                      | 0.428        |
| 12.3.7        | 0.71050                                | 0.00028                    | -1.72                      | 0.529        |
| 12.3.8        | 0.71065                                | 0.00031                    | -1.72                      | 0.460        |
| 12.3.9        | 0.71132                                | 0.00031                    | -1.74                      | 0.478        |

**County Vegadeo (4)**

| <b>Sample</b> | <b><math>^{87}\text{Sr}/^{86}\text{Sr}</math></b> | <b><math>U_{\text{Kragten}}</math></b> | <b><math>f_{\text{Russell}}</math></b> | <b>Sr/Rb</b> |
|---------------|---------------------------------------------------|----------------------------------------|----------------------------------------|--------------|
| 13.1.1        | 0.71185                                           | 0.00042                                | -1.88                                  | 0.404        |
| 13.1.2        | 0.71194                                           | 0.00037                                | -1.81                                  | 0.372        |
| 13.1.3        | 0.71204                                           | 0.00032                                | -1.78                                  | 0.474        |
| 13.1.4        | 0.71257                                           | 0.00041                                | -1.78                                  | 0.394        |
| 13.1.5        | 0.71226                                           | 0.00035                                | -1.78                                  | 0.480        |
| 13.1.6        | 0.71207                                           | 0.00036                                | -1.78                                  | 0.509        |
| 13.1.7        | 0.71156                                           | 0.00037                                | -1.80                                  | 0.474        |
| 13.1.8        | 0.71159                                           | 0.00032                                | -1.73                                  | 0.583        |
| 13.1.9        | 0.71175                                           | 0.00031                                | -1.73                                  | 0.589        |
| 13.2.1        | 0.71290                                           | 0.00040                                | -1.94                                  | 0.909        |
| 13.2.2        | 0.71177                                           | 0.00029                                | -1.79                                  | 1.101        |
| 13.2.3        | 0.71173                                           | 0.00033                                | -1.80                                  | 1.187        |
| 13.2.4        | 0.71099                                           | 0.00025                                | -1.73                                  | 1.771        |
| 13.2.5        | 0.71087                                           | 0.00026                                | -1.73                                  | 2.009        |
| 13.2.6        | 0.71064                                           | 0.00023                                | -1.70                                  | 2.355        |
| 13.2.7        | 0.71051                                           | 0.00023                                | -1.72                                  | 2.239        |
| 13.2.8        | 0.71070                                           | 0.00021                                | -1.71                                  | 2.309        |
| 13.2.9        | 0.71148                                           | 0.00022                                | -1.70                                  | 2.324        |
| 13.3.1        | 0.71232                                           | 0.00044                                | -2.02                                  | 0.540        |
| 13.3.2        | 0.71142                                           | 0.00034                                | -1.84                                  | 0.563        |
| 13.3.3        | 0.71091                                           | 0.00035                                | -1.77                                  | 0.583        |
| 13.3.4        | 0.71056                                           | 0.00030                                | -1.81                                  | 0.653        |
| 13.3.5        | 0.71058                                           | 0.00034                                | -1.74                                  | 0.662        |
| 13.3.6        | 0.71036                                           | 0.00029                                | -1.74                                  | 0.786        |
| 13.3.7        | 0.71039                                           | 0.00044                                | -1.73                                  | 0.591        |
| 13.3.8        | 0.71079                                           | 0.00033                                | -1.73                                  | 0.641        |
| 13.3.9        | 0.70994                                           | 0.00035                                | -1.81                                  | 0.670        |

| County | Tineo                           |                      |                      |       |
|--------|---------------------------------|----------------------|----------------------|-------|
| Sample | $^{87}\text{Sr}/^{86}\text{Sr}$ | $U_{\text{Kragten}}$ | $f_{\text{Russell}}$ | Sr/Rb |
| 14.1.1 | 0.71271                         | 0.00030              | -1.76                | 1.437 |
| 14.1.2 | 0.71251                         | 0.00029              | -1.75                | 1.515 |
| 14.1.3 | 0.71218                         | 0.00031              | -1.74                | 1.483 |
| 14.1.4 | 0.71226                         | 0.00027              | -1.72                | 1.946 |
| 14.1.5 | 0.71191                         | 0.00026              | -1.71                | 1.996 |
| 14.1.6 | 0.71187                         | 0.00032              | -1.71                | 1.762 |
| 14.1.7 | 0.71215                         | 0.00044              | -1.72                | 1.117 |
| 14.1.8 | 0.71279                         | 0.00050              | -1.76                | 1.032 |
| 14.1.9 | 0.71302                         | 0.00056              | -1.74                | 0.983 |
| 14.2.1 | 0.71255                         | 0.00047              | -1.90                | 0.573 |
| 14.2.2 | 0.71349                         | 0.00043              | -1.85                | 0.619 |
| 14.2.3 | 0.71228                         | 0.0004               | -1.80                | 0.618 |
| 14.2.4 | 0.71268                         | 0.00048              | -1.82                | 0.718 |
| 14.2.5 | 0.71141                         | 0.00064              | -1.81                | 0.619 |
| 14.2.6 | 0.71121                         | 0.00056              | -1.77                | 0.688 |
| 14.2.7 | 0.71302                         | 0.00062              | -1.77                | 0.602 |
| 14.2.8 | 0.71352                         | 0.00052              | -1.77                | 0.623 |
| 14.2.9 | 0.71243                         | 0.00051              | -1.74                | 0.601 |
| 14.3.1 | 0.71412                         | 0.00150              | -1.78                | 0.783 |
| 14.3.2 | 0.71431                         | 0.00047              | -1.87                | 0.923 |
| 14.3.3 | 0.71297                         | 0.00026              | -1.79                | 1.183 |
| 14.3.4 | 0.71217                         | 0.00022              | -1.74                | 1.297 |
| 14.3.5 | 0.71261                         | 0.00026              | -1.73                | 1.063 |
| 14.3.6 | 0.71255                         | 0.00026              | -1.72                | 1.207 |
| 14.3.7 | 0.71284                         | 0.00036              | -1.73                | 0.902 |
| 14.3.8 | 0.71376                         | 0.00037              | -1.73                | 0.869 |
| 14.3.9 | 0.71303                         | 0.00029              | -1.71                | 1.052 |

**County**                      **Valdés (5)**

| <b>Sample</b> | <b><math>^{87}\text{Sr}/^{86}\text{Sr}</math></b> | <b><math>U_{\text{Kragten}}</math></b> | <b><math>f_{\text{Russell}}</math></b> | <b>Sr/Rb</b> |
|---------------|---------------------------------------------------|----------------------------------------|----------------------------------------|--------------|
| 15.1.1        | 0.71007                                           | 0.00072                                | -1.86                                  | 0.474        |
| 15.1.2        | 0.71085                                           | 0.00040                                | -1.88                                  | 0.489        |
| 15.1.3        | 0.71089                                           | 0.00032                                | -1.82                                  | 0.575        |
| 15.1.4        | 0.70896                                           | 0.00034                                | -1.91                                  | 0.547        |
| 15.1.5        | 0.71032                                           | 0.00034                                | -1.79                                  | 0.571        |
| 15.1.6        | 0.70976                                           | 0.00036                                | -1.77                                  | 0.537        |
| 15.1.7        | 0.71012                                           | 0.00032                                | -1.76                                  | 0.527        |
| 15.1.8        | 0.70988                                           | 0.00033                                | -1.73                                  | 0.546        |
| 15.1.9        | 0.70956                                           | 0.00032                                | -1.72                                  | 0.616        |
| 15.2.1        | 0.71170                                           | 0.00038                                | -1.93                                  | 0.621        |
| 15.2.2        | 0.71017                                           | 0.00037                                | -1.81                                  | 0.653        |
| 15.2.3        | 0.71030                                           | 0.00032                                | -1.78                                  | 0.706        |
| 15.2.4        | 0.71013                                           | 0.00033                                | -1.73                                  | 0.739        |
| 15.2.5        | 0.71039                                           | 0.00037                                | -1.72                                  | 0.674        |
| 15.2.6        | 0.71069                                           | 0.00033                                | -1.73                                  | 0.772        |
| 15.2.7        | 0.71087                                           | 0.00032                                | -1.74                                  | 0.783        |
| 15.2.8        | 0.71031                                           | 0.00037                                | -1.70                                  | 0.695        |
| 15.2.9        | 0.71037                                           | 0.00031                                | -1.69                                  | 0.914        |
| 15.3.1        | 0.70629                                           | 0.00130                                | -2.01                                  | 0.108        |
| 15.3.2        | 0.71271                                           | 0.00107                                | -1.90                                  | 0.110        |
| 15.3.3        | 0.71167                                           | 0.00112                                | -1.85                                  | 0.109        |
| 15.3.4        | 0.71604                                           | 0.00156                                | -1.90                                  | 0.098        |
| 15.3.5        | 0.71273                                           | 0.00173                                | -1.87                                  | 0.088        |
| 15.3.6        | 0.71426                                           | 0.00171                                | -1.78                                  | 0.087        |
| 15.3.7        | 0.71280                                           | 0.00104                                | -1.78                                  | 0.140        |
| 15.3.8        | 0.71387                                           | 0.00114                                | -1.80                                  | 0.141        |
| 15.3.9        | 0.71388                                           | 0.00089                                | -1.77                                  | 0.161        |



**County****Tapia**

| <b>Sample</b> | <b><math>^{87}\text{Sr}/^{86}\text{Sr}</math></b> | <b><math>U_{\text{Kragten}}</math></b> | <b><math>f_{\text{Russell}}</math></b> | <b>Sr/Rb</b> |
|---------------|---------------------------------------------------|----------------------------------------|----------------------------------------|--------------|
| 16.1.1        | 0.71187                                           | 0.00040                                | -1.67                                  | 0.557        |
| 16.1.2        | 0.71230                                           | 0.00024                                | -1.76                                  | 0.570        |
| 16.1.3        | 0.71235                                           | 0.00020                                | -1.74                                  | 0.648        |
| 16.1.4        | 0.71304                                           | 0.00021                                | -1.73                                  | 0.683        |
| 16.1.5        | 0.71224                                           | 0.00021                                | -1.71                                  | 0.650        |
| 16.1.6        | 0.71215                                           | 0.00021                                | -1.71                                  | 0.584        |
| 16.1.7        | 0.71359                                           | 0.00022                                | -1.71                                  | 0.562        |
| 16.1.8        | 0.71227                                           | 0.00017                                | -1.69                                  | 0.835        |
| 16.1.9        | 0.71236                                           | 0.00018                                | -1.69                                  | 0.863        |
| 16.2.1        | 0.71199                                           | 0.00021                                | -1.75                                  | 0.794        |
| 16.2.2        | 0.71207                                           | 0.00018                                | -1.75                                  | 0.968        |
| 16.2.3        | 0.71224                                           | 0.00017                                | -1.71                                  | 1.025        |
| 16.2.4        | 0.71221                                           | 0.00016                                | -1.71                                  | 1.503        |
| 16.2.5        | 0.71193                                           | 0.00016                                | -1.70                                  | 1.639        |
| 16.2.6        | 0.71181                                           | 0.00015                                | -1.69                                  | 1.754        |
| 16.2.7        | 0.71178                                           | 0.00016                                | -1.68                                  | 1.652        |
| 16.2.8        | 0.71204                                           | 0.00016                                | -1.68                                  | 1.630        |
| 16.2.9        | 0.71193                                           | 0.00016                                | -1.68                                  | 1.517        |
| 16.3.1        | 0.71109                                           | 0.00025                                | -1.76                                  | 0.543        |
| 16.3.2        | 0.71176                                           | 0.00024                                | -1.76                                  | 0.517        |
| 16.3.3        | 0.71154                                           | 0.00025                                | -1.75                                  | 0.523        |
| 16.3.4        | 0.71155                                           | 0.00034                                | -1.75                                  | 0.469        |
| 16.3.5        | 0.71127                                           | 0.00028                                | -1.73                                  | 0.515        |
| 16.3.6        | 0.71118                                           | 0.00026                                | -1.74                                  | 0.593        |
| 16.3.7        | 0.71170                                           | 0.00026                                | -1.72                                  | 0.526        |
| 16.3.8        | 0.71194                                           | 0.00025                                | -1.72                                  | 0.496        |
| 16.3.9        | 0.71218                                           | 0.00022                                | -1.72                                  | 0.542        |

**County**                      **El Franco**

| <b>Sample</b> | <b><sup>87</sup>Sr/<sup>86</sup>Sr</b> | <b>U<sub>Kragten</sub></b> | <b>f<sub>Russell</sub></b> | <b>Sr/Rb</b> |
|---------------|----------------------------------------|----------------------------|----------------------------|--------------|
| 17.1.1        | 0.70626                                | 0.00025                    | -1.68                      | 0.775        |
| 17.1.2        | 0.70694                                | 0.00021                    | -1.71                      | 0.869        |
| 17.1.3        | 0.70678                                | 0.00018                    | -1.72                      | 1.000        |
| 17.1.4        | 0.70704                                | 0.00016                    | -1.73                      | 1.193        |
| 17.1.5        | 0.70700                                | 0.00016                    | -1.73                      | 1.286        |
| 17.1.6        | 0.70671                                | 0.00016                    | -1.73                      | 1.420        |
| 17.1.7        | 0.70690                                | 0.00016                    | -1.73                      | 1.217        |
| 17.1.8        | 0.70675                                | 0.00016                    | -1.72                      | 1.126        |
| 17.1.9        | 0.70714                                | 0.00016                    | -1.73                      | 1.392        |
| 17.2.1        | 0.70601                                | 0.00024                    | -1.71                      | 0.500        |
| 17.2.2        | 0.70686                                | 0.00021                    | -1.74                      | 0.541        |
| 17.2.3        | 0.70701                                | 0.00020                    | -1.74                      | 0.640        |
| 17.2.4        | 0.70645                                | 0.00021                    | -1.73                      | 0.635        |
| 17.2.5        | 0.70597                                | 0.00019                    | -1.73                      | 0.686        |
| 17.2.6        | 0.70622                                | 0.00019                    | -1.74                      | 0.703        |
| 17.2.7        | 0.70616                                | 0.00019                    | -1.72                      | 0.673        |
| 17.2.8        | 0.70621                                | 0.00021                    | -1.72                      | 0.621        |
| 17.2.9        | 0.70649                                | 0.00020                    | -1.72                      | 0.634        |
| 17.3.1        | 0.70731                                | 0.00026                    | -1.74                      | 0.503        |
| 17.3.2        | 0.70800                                | 0.00023                    | -1.74                      | 0.539        |
| 17.3.3        | 0.70800                                | 0.00019                    | -1.73                      | 0.599        |
| 17.3.4        | 0.70811                                | 0.00022                    | -1.73                      | 0.508        |
| 17.3.5        | 0.70846                                | 0.00023                    | -1.73                      | 0.520        |
| 17.3.6        | 0.70804                                | 0.00022                    | -1.72                      | 0.520        |
| 17.3.7        | 0.70776                                | 0.00018                    | -1.71                      | 0.669        |
| 17.3.8        | 0.70840                                | 0.00018                    | -1.71                      | 0.740        |
| 17.3.9        | 0.70784                                | 0.00016                    | -1.70                      | 0.988        |

**County**                      **Valdés (6)**

| <b>Sample</b> | <b><math>^{87}\text{Sr}/^{86}\text{Sr}</math></b> | <b><math>U_{\text{Kragten}}</math></b> | <b><math>f_{\text{Russell}}</math></b> | <b>Sr/Rb</b> |
|---------------|---------------------------------------------------|----------------------------------------|----------------------------------------|--------------|
| 18.1.1        | 0.71239                                           | 0.00069                                | -1.90                                  | 0.228        |
| 18.1.2        | 0.71405                                           | 0.00041                                | -1.82                                  | 0.279        |
| 18.1.3        | 0.71382                                           | 0.00035                                | -1.78                                  | 0.325        |
| 18.1.4        | 0.71397                                           | 0.00038                                | -1.78                                  | 0.254        |
| 18.1.5        | 0.71358                                           | 0.00028                                | -1.77                                  | 0.349        |
| 18.1.6        | 0.71373                                           | 0.00026                                | -1.75                                  | 0.404        |
| 18.1.7        | 0.71404                                           | 0.00029                                | -1.74                                  | 0.370        |
| 18.1.8        | 0.71364                                           | 0.00024                                | -1.73                                  | 0.419        |
| 18.1.9        | 0.71390                                           | 0.00029                                | -1.72                                  | 0.380        |
| 18.2.1        | 0.71447                                           | 0.00038                                | -1.87                                  | 0.546        |
| 18.2.2        | 0.71333                                           | 0.00024                                | -1.76                                  | 0.614        |
| 18.2.3        | 0.71294                                           | 0.00020                                | -1.73                                  | 0.765        |
| 18.2.4        | 0.71383                                           | 0.00025                                | -1.74                                  | 0.512        |
| 18.2.5        | 0.71321                                           | 0.00020                                | -1.74                                  | 0.718        |
| 18.2.6        | 0.71340                                           | 0.00021                                | -1.74                                  | 0.619        |
| 18.2.7        | 0.71329                                           | 0.00024                                | -1.72                                  | 0.597        |
| 18.2.8        | 0.71307                                           | 0.00021                                | -1.71                                  | 0.655        |
| 18.2.9        | 0.71375                                           | 0.00020                                | -1.71                                  | 0.733        |
| 18.3.1        | 0.71496                                           | 0.00043                                | -1.92                                  | 0.436        |
| 18.3.2        | 0.71413                                           | 0.00027                                | -1.78                                  | 0.506        |
| 18.3.3        | 0.71425                                           | 0.00025                                | -1.77                                  | 0.560        |
| 18.3.4        | 0.71414                                           | 0.00022                                | -1.74                                  | 0.731        |
| 18.3.5        | 0.71332                                           | 0.00019                                | -1.75                                  | 0.818        |
| 18.3.6        | 0.71376                                           | 0.00020                                | -1.72                                  | 0.775        |
| 18.3.7        | 0.71397                                           | 0.00019                                | -1.74                                  | 0.784        |
| 18.3.8        | 0.71434                                           | 0.00022                                | -1.72                                  | 0.694        |
| 18.3.9        | 0.71415                                           | 0.00024                                | -1.71                                  | 0.617        |

**Country**                      **Bolivia (1)**

| <b>Sample</b> | <b><math>^{87}\text{Sr}/^{86}\text{Sr}</math></b> | <b><math>U_{\text{Kragten}}</math></b> | <b><math>f_{\text{Russell}}</math></b> | <b>Sr/Rb</b> |
|---------------|---------------------------------------------------|----------------------------------------|----------------------------------------|--------------|
| <b>B1.1</b>   | 0.72421                                           | 0.00015                                | -1.73                                  | 8.337        |
| <b>B1.2</b>   | 0.72407                                           | 0.00015                                | -1.73                                  | 9.442        |
| <b>B1.3</b>   | 0.72413                                           | 0.00015                                | -1.73                                  | 9.593        |
| <b>B1.4</b>   | 0.72416                                           | 0.00015                                | -1.73                                  | 10.971       |
| <b>B1.5</b>   | 0.72417                                           | 0.00015                                | -1.73                                  | 11.004       |

**Country**                      **Bolivia (2)**

| <b>Sample</b> | <b><math>^{87}\text{Sr}/^{86}\text{Sr}</math></b> | <b><math>U_{\text{Kragten}}</math></b> | <b><math>f_{\text{Russell}}</math></b> | <b>Sr/Rb</b> |
|---------------|---------------------------------------------------|----------------------------------------|----------------------------------------|--------------|
| <b>B2.1</b>   | 0.72575                                           | 0.00016                                | -1.72                                  | 1.311        |
| <b>B2.2</b>   | 0.72591                                           | 0.00016                                | -1.73                                  | 1.439        |
| <b>B2.3</b>   | 0.72567                                           | 0.00016                                | -1.73                                  | 1.586        |
| <b>B2.4</b>   | 0.72558                                           | 0.00017                                | -1.71                                  | 1.311        |
| <b>B2.5</b>   | 0.72562                                           | 0.00016                                | -1.73                                  | 1.341        |

**Country**                      **Argentina**

| <b>Sample</b> | <b><math>^{87}\text{Sr}/^{86}\text{Sr}</math></b> | <b><math>U_{\text{Kragten}}</math></b> | <b><math>f_{\text{Russell}}</math></b> | <b>Sr/Rb</b> |
|---------------|---------------------------------------------------|----------------------------------------|----------------------------------------|--------------|
| <b>A1</b>     | 0.71240                                           | 0.00018                                | -1.69                                  | 7.222        |
| <b>A2</b>     | 0.71241                                           | 0.00017                                | -1.68                                  | 7.089        |
| <b>A3</b>     | 0.71218                                           | 0.00017                                | -1.67                                  | 7.651        |
| <b>A4</b>     | 0.71221                                           | 0.00016                                | -1.68                                  | 9.620        |
| <b>A5</b>     | 0.71246                                           | 0.00016                                | -1.67                                  | 9.464        |
